# Supplementary material for: Demonstration of beam steering via dipole-coupled plasmonic spiral antenna
Source: PubMed Central journal article supplement — Sci Rep. 2013 Jul 19;3:2237. doi: 10.1038/srep02237 (PMC3715748; doi:10.1038/srep02237), 2013-07-19
Supplement: srep02237-s3.pdf [file srep02237-s3.pdf]

**Supplementary Information for**

**Demonstration of beam steering via dipole-coupled  
plasmonic spiral antenna**

Guanghao Rui<sup>1</sup>, Don C. Abeysinghe<sup>2</sup>, Robert L. Nelson<sup>2</sup> and Qiwen Zhan<sup>1\*</sup>

<sup>1</sup>Electro-Optics Program, University of Dayton, 300 College Park, Dayton,  
OH 45469, USA

<sup>2</sup>Air Force Research Laboratory, Wright–Patterson Air Force Base, Dayton,  
OH 45433, USA

E-mails: [\\*qzhan1@udayton.edu](mailto:qzhan1@udayton.edu)

## **Movies**

Two supporting movie clips are provided in the Supporting Information.

Movie clip 1: scanning along  $x$  direction

Description: The collected fluorescence signals when the sample was scanned along  $x$  direction within a range of 500 nm around the geometrical center.

Movie clip 2: scanning along  $y$  direction

Description: The collected fluorescence signals when the sample was scanned along  $y$  direction within a range of 500 nm around the geometrical center.
